# Supplementary material
Source: publisher site journal article supplement (https://www.spandidos-publications.com/2069/downloadSupplementary)

Figure S1. The sequence of (A) hsa\_circRNA\_0079201 plasmid or its mutated fragment and (B) SMAD2 plasmid or its mutated fragment. WT, wild-type; Mut, mutated; circRNA, circular RNA; miR, microRNA.

**A** Luciferase reporter assay: hsa\_circRNA\_0079201 plasmid mutated

```

hsa_circ_0079201-wt:↵
GCCCCAAGAGCTCCCAGCTCCCAGCTCCCAGCAGCAGGCACTGCGAGCAAGACTGGCCGCCGGATTCCA
GCGAGGAGGGGCTCCCGCGGCCCCGCTCCCCCTGCTCTGATGGGAGAAGAGACGCCGCGGCCAGAGT
CCTGCAGGCCCAGTGGAAGGTGTACAAGCACAAGAAAAAAAGGCTGTTCTGGATGAGGCGGCTGTG
GTGCTTCAGGCAGCTTTTCAGGGGACATCTCACGCGGACAAAGCTCTTAGCAAGCAAAGCACATGGCT
CAGAGCCACCCAGCGTGCCAGGCCTCCCAGACCAG↵
hsa_circ_0079201-mut:↵
GCCCCAAGAGCTCCCAGCTCCCAGCTCCCAGCAGCAGGCACTGCGAGCAAGACTGGCCGCCGGATTCCA
GCGAGGAGGGGCTCCCGCGGCCCCGCTCCCCCTGCTCTGATGGGAGAAGAGACGCCGCGGCCAGAGT
CCTGCAGGCCCAGTGGAAGGTGTACAAGCACAAGAAAAAAAGGCTGTTCTGGATGAGGCGGgTcTc
GaGCTTCAGGCAGCTTTTCAGGGGACATCTCACGCGGACAAAGCTCTTAGCAAGCAAAGCACATGGCT
CAGAGCCACCCAGCGTGCCAGGCCTCCCAGACCAG↵
↵
>hsa-miR-140-3p MIMAT0004597↵
5'-UACCACAGGGUAGAACCACGG-3'↵

```

**B** Luciferase reporter assay: SMAD2 plasmid mutated

```

h-SMAD2-3UTR-wt:
AGCTTCACCAATCAAGTCCCATGAAAAGACTTAATGTAACAACCTCTTCTGTCATAGCATTGTGTGTGGTCCCTATGG
ACTGTTTACTATCCAAAAGTTCAAGAGAGAAAACAGCACTTGAGGTCTCATCAATTAAAGCACCTTGTGGAATCTGT
TTCCTATATTTGAATATTAGATGGGAAAATAGTGTCTAGAAATACTCTCCATTAAAGAGGAAGAGAAGATTTTAA
AGACTTAATGATGTCTTATTGGGCATAAACTGAGTGTCCCAAAGGTTTATTAATAACAGTAGTAGTTA↓
↓
h-SMAD2-3UTR-mut:↓
AGCTTCACCAATCAAGTCCCATGAAAAGACTTAATGTAACAACCTCTTCTGTCATAGCATTGTGaGaGcTCCCTATGG
ACTGTTTACTATCCAAAAGTTCAAGAGAGAAAACAGCACTTGAGGTCTCATCAATTAAAGCACCTTGTGGAATCTGT
TTCCTATATTTGAATATTAGATGGGAAAATAGTGTCTAGAAATACTCTCCATTAAAGAGGAAGAGAAGATTTTAA
AGACTTAATGATGTCTTATTGGGCATAAACTGAGTGTCCCAAAGGTTTATTAATAACAGTAGTAGTTA↓
↓
>hsa-miR-140-3p MIMAT0004597↓
UACCACAGGGUAGAACCACGG↓

```

Figure S2. Successful transfection was observed in the cells transfected with the hsa\_circRNA\_0079201 overexpressing and empty plasmid. GFP, green fluorescent protein.

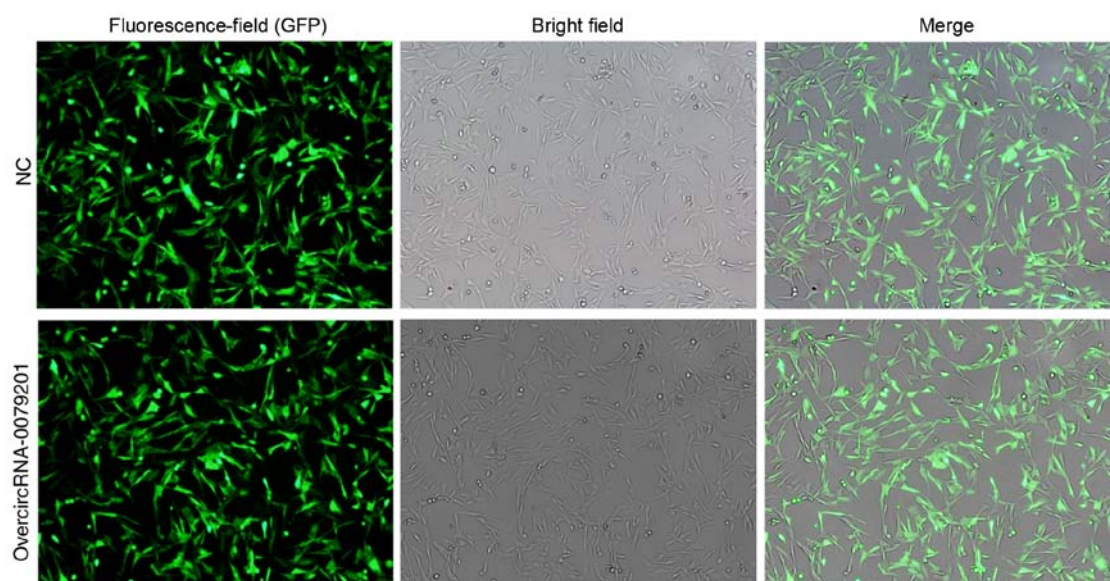

Figure S3. The mRNA expression level of (A) hsa-miR-140-3P, (B) hsa-miR-635 and (C) hsa-miR-564 was decreased following transfection with overcircRNA\_0079201 vector. \* $P < 0.05$ , \*\*\* $P < 0.001$  vs. NC. NC, negative control; circRNA, circular RNA; miR, microRNA.

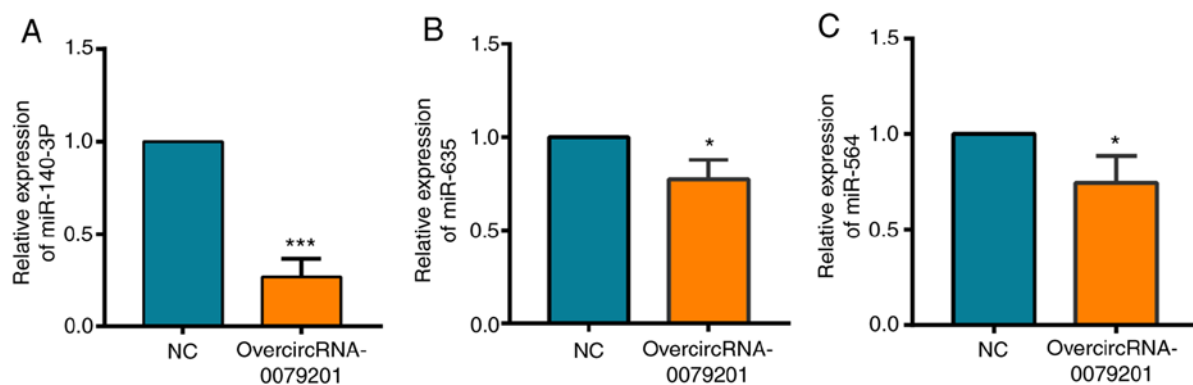

Supplement: Supplementary file 1 [file downloadSupplementary]
